# Supplementary material for: Unbiased Screening Identifies Functional Differences in NK Cells After Early Life Psychosocial Stress
Source: PubMed Central journal article supplement (PMC8363253; doi:10.3389/fimmu.2021.674532), 2021-07-30
Supplement: DataSheet_1.pdf [file DataSheet_1.pdf]

**Supplementary Table 1** – Description of the antibodies used for immunophenotyping.

| <b>IMMUNOPHENOTYPING</b>           |                    |              |                                |
|------------------------------------|--------------------|--------------|--------------------------------|
| <b>Cell type</b>                   | <b>Antibody</b>    | <b>Laser</b> | <b>Reference</b>               |
| T cells                            | CD3                | FITC         | BD 559975                      |
| T helper cell                      | CD4                | BV510        | BD 740138                      |
| T cytotoxic cell                   | CD8                | BUV395       | BD 740257                      |
| B cells                            | CD45RA             | PE Cy5       | BD 561624                      |
| Activation marker                  | CD25               | BV650        | BD 742755                      |
| NK cells                           | CD161a             | BV605        | BD 744051                      |
| Macrophages, dendritic cells       | CD11b/c            | BB700        | BD 746165                      |
| Activation marker B cells          | RT1B               | BV786        | BD 744131                      |
| T regulatory cells                 | FoxP3              | APC          | BD 566527                      |
| Viability marker                   | Live/Dead          | APC Cy7      | Biologend 423105               |
| <b>NK CELL MATURATION ASSAY</b>    |                    |              |                                |
| T cells                            | CD3                | PerCP Cy5.5  | ThermoFisher 46-0030-82        |
| NK cell                            | CD161a             | BV605        | BD BV605                       |
| NK cell phenotypic marker          | NKp46 (CD335)      | APC          | Biologend, 250808              |
| NK cells maturation marker         | CD27               | BUV737       | BD 612831                      |
| NK cells maturation marker         | CD11b              | PE           | BD 562105                      |
| Viability marker                   | Live/Dead          | APC-Cy7      | Biologend 423105               |
| <b>NK CELL CYTOTOXICITY ASSAY</b>  |                    |              |                                |
| Viability marker                   | TO-PRO             | APC          | ThermoFisher Scientific T3605  |
| Viability marker                   | Cell Tracer Violet | Pacific Blue | ThermoFisher Scientific C34571 |
| <b>NK CELL DEGRANULATION ASSAY</b> |                    |              |                                |
| T cells                            | CD3                | BV510        | BD 563109                      |
| NK cell phenotypic marker          | CD19               | PE-Cy5       | Biologend 302210               |
| NK cell phenotypic marker          | CD16               | BUV496       | BD 564653                      |
| NK cell phenotypic marker          | CD56               | BV711        | BD 563169                      |
| NK cell functional marker          | CD107a             | FITC         | Biologend 328606               |
| Cytokine                           | IFN $\gamma$       | PE           | BD 502509                      |
| Viability marker                   | Cell Tracer Violet | Pacific Blue | ThermoFisher Scientific C34571 |
| Viability marker                   | Live/Dead          | APC Cy7      | Biologend 423105               |

**SupplementaryTable 2** - Clusters obtained from viSNE unbiased phenotyping. Association of the markers used with each cluster and p values obtained after statistical analysis.

| Cluster | Markers                                                                      | Cluster size |               |              | P value  | Post-hoc test           |                          |                                       |
|---------|------------------------------------------------------------------------------|--------------|---------------|--------------|----------|-------------------------|--------------------------|---------------------------------------|
|         |                                                                              | Control      | MD15          | MD30         |          | CTR vs MD <sub>15</sub> | CTR vs MD <sub>180</sub> | MD <sub>15</sub> vs MD <sub>180</sub> |
| 1       | CD3 <sup>+</sup> ; CD4 <sup>+</sup> ; CD25 <sup>+</sup> ; FoxP3 <sup>+</sup> | 1.95 +/-0.26 | 1.19 +/- 0.17 | 1.31 +/-0.18 | 1.34E-10 | 3.73E-10                | 1.86E-08                 | 3.29E-01                              |
| 2       | CD3 <sup>+</sup> ; CD4 <sup>+</sup>                                          | 2.71 +/-1.02 | 0.85 +/-0.47  | 2.11 +/-1.11 | 6.79E-05 | 5.39E-05                | 2.55E-01                 | 5.10E-03                              |
| 3       | CD3 <sup>+</sup> ; CD4 <sup>+</sup>                                          | 4.03 +/-1.01 | 2.56 +/-0.92  | 3.87 +/-1.25 | 3.23E-03 | 5.30E-03                | 9.31E-01                 | 1.34E-02                              |
| 4       | CD3 <sup>+</sup> ; CD4 <sup>+</sup>                                          | 3.78 +/-0.80 | 2.69 +/-0.72  | 2.62 +/-0.84 | 1.27E-03 | 4.91E-03                | 2.82E-03                 | 9.77E-01                              |
| 5       | CD3 <sup>+</sup> ; CD4 <sup>+</sup>                                          | 1.59 +/-0.77 | 1.31 +/-0.48  | 2.35 +/-1.08 | 1.06E-02 | 6.70E-01                | 7.41E-02                 | 9.92E-03                              |
| 6       | CD45RA <sup>+</sup> ; RT1B <sup>+</sup>                                      | 1.01 +/-0.45 | 1.87 +/-0.81  | 1.61 +/-0.46 | 3.95E-03 | 3.44E-03                | 4.86E-02                 | 5.40E-01                              |
| 7       | CD45RA <sup>+</sup> ; RT1B <sup>+</sup>                                      | 1.89 +/-0.79 | 2.21 +/-0.65  | 1.13 +/-0.28 | 4.39E-04 | 4.13E-01                | 1.25E-02                 | 3.82E-04                              |
| 8       | CD3 <sup>+</sup> ; CD8 <sup>+</sup>                                          | 3.46 +/-0.65 | 3.28 +/-0.56  | 2.47 +/-0.71 | 1.30E-03 | 7.56E-01                | 1.65E-03                 | 1.10E-02                              |
| 9       | CD3 <sup>+</sup> ; CD4 <sup>+</sup>                                          | 4.32 +/-0.37 | 2.22 +/-0.42  | 2.36 +/-0.37 | 2.48E-15 | 2.62E-14                | 1.73E-13                 | 6.59E-01                              |
| 10      | CD3 <sup>+</sup> ; CD4 <sup>+</sup>                                          | 2.28 +/-0.35 | 2.31 +/-0.76  | 3.21 +/-0.66 | 8.32E-04 | 9.93E-01                | 2.18E-03                 | 3.00E-03                              |
| 11      | CD3 <sup>+</sup> ; CD4 <sup>+</sup>                                          | 0.82 +/-0.22 | 2.31 +/-0.49  | 2.09 +/-0.82 | 3.26E-07 | 7.33E-07                | 1.27E-05                 | 5.99E-01                              |
| 12      | CD3 <sup>+</sup> ; CD4 <sup>+</sup>                                          | ns           | ns            | ns           | ns       | ns                      | ns                       | ns                                    |
| 13      | CD45RA <sup>+</sup>                                                          | 1.05 +/-0.40 | 2.11 +/-0.55  | 1.38 +/-0.62 | 8.57E-05 | 7.18E-05                | 3.01E-01                 | 5.00E-03                              |
| 14      | CD45RA <sup>+</sup> ; RT1B <sup>+</sup>                                      | 1.39 +/-0.62 | 2.96 +/-1.01  | 1.61 +/-0.47 | 1.50E-05 | 3.05E-05                | 7.55E-01                 | 2.47E-04                              |
| 15      | CD3 <sup>+</sup> ; CD8 <sup>+</sup>                                          | ns           | ns            | ns           | ns       | ns                      | ns                       | ns                                    |
| 16      | CD3 <sup>+</sup> ; CD8 <sup>+</sup>                                          | 1.85 +/-0.28 | 2.57 +/-0.72  | 2.46 +/-0.87 | 2.71E-02 | 3.31E-02                | 7.98E-02                 | 9.16E-01                              |
| 17      | RORγT <sup>+</sup>                                                           | ns           | ns            | ns           | ns       | ns                      | ns                       | ns                                    |
| 18      | CD11b/c <sup>+</sup>                                                         | 0.86 +/-0.20 | 1.87 +/-0.39  | 2.20 +/-0.55 | 4.47E-09 | 1.70E-06                | 5.57E-09                 | 1.25E-01                              |
| 19      | CD11b/c <sup>+</sup>                                                         | 0.52 +/-0.30 | 1.96 +/-0.61  | 1.54 +/-0.55 | 1.92E-07 | 1.73E-07                | 6.70E-05                 | 1.19E-01                              |
| 20      | CD11b/c <sup>+</sup>                                                         | 0.61 +/-0.16 | 0.51 +/-0.20  | 1.24 +/-0.98 | 8.27E-03 | 9.10E-01                | 3.13E-02                 | 1.15E-02                              |
| 21      | CD45RA <sup>+</sup> ; RT1B <sup>+</sup>                                      | 0.99 +/-0.25 | 2.35 +/-0.67  | 2.62 +/-0.68 | 7.25E-08 | 4.42E-06                | 1.55E-07                 | 4.90E-01                              |
| 22      | CD3 <sup>+</sup> ; CD8 <sup>+</sup>                                          | 3.40 +/-1.16 | 1.69 +/-0.87  | 2.59 +/-1.05 | 1.29E-03 | 8.44E-04                | 1.52E-01                 | 9.81E-02                              |
| 23      | CD8 <sup>+</sup> ;                                                           | 0.81 +/-0.47 | 2.15 +/-1.21  | 1.76 +/-1.50 | 2.10E-02 | 1.89E-02                | 1.23E-01                 | 6.75E-01                              |
| 24      | CD11b/c <sup>+</sup>                                                         | ns           | ns            | ns           | ns       | ns                      | ns                       | ns                                    |
| 25      | CD11b/c <sup>+</sup>                                                         | 1.37 +/-0.39 | 2.1 +/-0.61   | 1.67 +/-0.60 | 5.77E-03 | 4.30E-03                | 3.79E-01                 | 1.05E-01                              |
| 26      | CD11b/c <sup>+</sup>                                                         | 0.62 +/-0.48 | 1.43 +/-0.65  | 1.57 +/-0.48 | 2.68E-04 | 2.45E-03                | 4.49E-04                 | 8.18E-01                              |
| 27      | CD45RA <sup>+</sup> ; RT1B <sup>+</sup>                                      | 1.00 +/-0.29 | 3.37 +/-0.68  | 2.26 +/-0.47 | 2.86E-12 | 1.33E-12                | 2.01E-06                 | 1.79E-05                              |
| 28      | CD45RA <sup>+</sup> ; RT1B <sup>+</sup>                                      | 0.88 +/-0.19 | 2.24 +/-0.72  | 2.18 +/-0.54 | 2.34E-07 | 1.28E-06                | 2.85E-06                 | 9.60E-01                              |
| 29      | CD161a <sup>+</sup>                                                          | 0.96 +/-0.21 | 1.04 +/-0.24  | 1.25 +/-0.23 | 1.00E-02 | 6.92E-01                | 9.65E-03                 | 6.71E-02                              |
| 30      | CD8 <sup>+</sup> ; CD11b/c <sup>+</sup>                                      | 2.55 +/-1.37 | 1.61 +/-1.04  | 1.27 +/-1.08 | 3.27E-02 | 1.40E-01                | 3.12E-02                 | 7.61E-01                              |
| 31      | CD11b/c <sup>+</sup>                                                         | ns           | ns            | ns           | ns       | ns                      | ns                       | ns                                    |
